# Supplementary material
Source: publisher figshare collection journal article supplement (https://frontiersin.figshare.com/ndownloader/files/17471405)
Supplement: Supplementary file [file 17471405]

|          | 6OMTs  |        |         |        |         |         |          |         | 4'OMTs |         |         |          |          |        |         |         | 7OMTs   |          |         |         |         |         |         |         | Scoulerine OMTs |         |         |         |         |        |        |        |
|----------|--------|--------|---------|--------|---------|---------|----------|---------|--------|---------|---------|----------|----------|--------|---------|---------|---------|----------|---------|---------|---------|---------|---------|---------|-----------------|---------|---------|---------|---------|--------|--------|--------|
|          | Tf6OMT | Cj6OMT | Cc6OMT2 | Ps6OMT | Gf6OMT2 | Ps6OMT3 | Ps6OMT3b | Ps6OMT7 | Cc6OMT | Tf4'OMT | Gf4'OMT | Ps4'OMT1 | Ps4'OMT2 | Cc6OMT | Cc6OMT1 | Gf6OMT4 | Ps6OMT2 | Ps6OMT2b | Ec6'OMT | Cc6'OMT | Gf6OMT3 | Ps7'OMT | Ec7'OMT | Ec6'OMT | Gf6OMT5         | Ec6'OMT | Gf6OMT7 | Ps6OMT3 | Gf6OMT6 | Tf6OMT | Cc6OMT | Cc6OMT |
| Tf6OMT   | 100    | 85     | 85      | 66     | 68      | 62      | 62       | 57      | 52     | 51      | 52      | 48       | 49       | 37     | 43      | 44      | 39      | 39       | 37      | 41      | 41      | 40      | 39      | 40      | 35              | 36      | 35      | 31      | 33      | 31     | 31     | 31     |
| Cj6OMT   |        | 100    | 98      | 69     | 72      | 63      | 63       | 59      | 52     | 51      | 52      | 49       | 50       | 39     | 45      | 44      | 42      | 42       | 38      | 43      | 42      | 41      | 38      | 40      | 35              | 36      | 35      | 33      | 33      | 32     | 31     | 32     |
| Cc6OMT2  |        |        | 100     | 69     | 71      | 63      | 63       | 59      | 52     | 51      | 53      | 50       | 51       | 39     | 45      | 44      | 41      | 41       | 37      | 43      | 41      | 40      | 38      | 40      | 36              | 36      | 36      | 32      | 34      | 33     | 32     | 32     |
| Ps6OMT   |        |        |         | 100    | 82      | 81      | 81       | 71      | 56     | 56      | 53      | 51       | 52       | 40     | 44      | 45      | 42      | 42       | 38      | 43      | 41      | 40      | 38      | 41      | 33              | 34      | 36      | 32      | 31      | 31     | 31     | 31     |
| Gf6OMT2  |        |        |         |        | 100     | 73      | 73       | 69      | 56     | 55      | 55      | 52       | 53       | 39     | 44      | 46      | 42      | 42       | 41      | 43      | 40      | 41      | 40      | 42      | 33              | 35      | 35      | 33      | 32      | 33     | 33     | 33     |
| Ps6OMT3  |        |        |         |        |         | 100     | 99       | 65      | 52     | 52      | 49      | 47       | 48       | 35     | 38      | 40      | 37      | 37       | 38      | 39      | 38      | 38      | 36      | 38      | 31              | 33      | 33      | 29      | 28      | 27     | 27     | 27     |
| Ps6OMT3b |        |        |         |        |         |         | 100      | 65      | 52     | 52      | 49      | 47       | 47       | 35     | 38      | 40      | 38      | 38       | 38      | 38      | 38      | 37      | 36      | 38      | 31              | 32      | 33      | 29      | 28      | 27     | 27     | 27     |
| Ps6OMT7  |        |        |         |        |         |         |          | 100     | 49     | 50      | 45      | 42       | 45       | 37     | 41      | 39      | 35      | 35       | 36      | 40      | 37      | 38      | 36      | 39      | 31              | 32      | 33      | 29      | 31      | 32     | 32     | 32     |
| Cj4'OMT  |        |        |         |        |         |         |          |         | 100    | 89      | 72      | 63       | 68       | 36     | 41      | 40      | 36      | 36       | 37      | 40      | 37      | 37      | 38      | 37      | 35              | 36      | 35      | 32      | 31      | 33     | 32     | 33     |
| Tf4'OMT  |        |        |         |        |         |         |          |         |        | 100     | 71      | 64       | 67       | 37     | 42      | 42      | 38      | 38       | 38      | 42      | 39      | 39      | 39      | 39      | 35              | 37      | 34      | 31      | 31      | 35     | 34     | 35     |
| Gf6OMT1  |        |        |         |        |         |         |          |         |        |         | 100     | 73       | 78       | 34     | 43      | 43      | 41      | 41       | 34      | 40      | 37      | 37      | 36      | 36      | 36              | 35      | 34      | 29      | 28      | 30     | 29     | 29     |
| Ps4'OMT1 |        |        |         |        |         |         |          |         |        |         |         | 100      | 81       | 36     | 43      | 42      | 39      | 39       | 35      | 37      | 36      | 37      | 37      | 38      | 33              | 32      | 31      | 29      | 29      | 30     | 30     | 30     |
| Ps4'OMT2 |        |        |         |        |         |         |          |         |        |         |         |          | 100      | 36     | 44      | 42      | 40      | 40       | 35      | 40      | 37      | 38      | 36      | 37      | 35              | 34      | 32      | 30      | 29      | 31     | 30     | 32     |
| CjCoOMT  |        |        |         |        |         |         |          |         |        |         |         |          |          | 100    | 38      | 38      | 37      | 37       | 37      | 35      | 32      | 36      | 33      | 34      | 25              | 26      | 28      | 26      | 28      | 25     | 26     | 26     |
| Cc6OMT1  |        |        |         |        |         |         |          |         |        |         |         |          |          |        | 100     | 61      | 53      | 53       | 36      | 39      | 37      | 39      | 39      | 38      | 32              | 31      | 33      | 31      | 31      | 30     | 30     | 31     |
| Gf6OMT4  |        |        |         |        |         |         |          |         |        |         |         |          |          |        |         | 100     | 59      | 59       | 35      | 40      | 39      | 40      | 38      | 40      | 32              | 32      | 31      | 32      | 29      | 29     | 29     | 30     |
| Ps6OMT2  |        |        |         |        |         |         |          |         |        |         |         |          |          |        |         |         | 100     | 99.7     | 31      | 37      | 37      | 36      | 35      | 37      | 29              | 30      | 29      | 29      | 28      | 27     | 26     | 27     |
| Ps6OMT2b |        |        |         |        |         |         |          |         |        |         |         |          |          |        |         |         |         | 100      | 31      | 37      | 37      | 36      | 35      | 37      | 29              | 30      | 29      | 29      | 28      | 27     | 26     | 27     |
| EcG11OMT |        |        |         |        |         |         |          |         |        |         |         |          |          |        |         |         |         |          | 100     | 38      | 36      | 39      | 38      | 41      | 32              | 30      | 30      | 28      | 29      | 29     | 28     | 28     |
| Ct67OMT  |        |        |         |        |         |         |          |         |        |         |         |          |          |        |         |         |         |          |         | 100     | 58      | 54      | 54      | 64      | 38              | 37      | 41      | 38      | 38      | 36     | 36     | 36     |
| Gf6OMT3  |        |        |         |        |         |         |          |         |        |         |         |          |          |        |         |         |         |          |         |         | 100     | 64      | 54      | 59      | 36              | 36      | 36      | 33      | 34      | 35     | 34     | 35     |
| Ps7OMT   |        |        |         |        |         |         |          |         |        |         |         |          |          |        |         |         |         |          |         |         |         | 100     | 53      | 57      | 37              | 37      | 39      | 33      | 33      | 32     | 33     | 33     |
| Ec7OMT   |        |        |         |        |         |         |          |         |        |         |         |          |          |        |         |         |         |          |         |         |         |         | 100     | 63      | 37              | 36      | 36      | 33      | 33      | 33     | 32     | 33     |
| Ec6'OMT  |        |        |         |        |         |         |          |         |        |         |         |          |          |        |         |         |         |          |         |         |         |         |         | 100     | 40              | 38      | 39      | 38      | 37      | 36     | 36     | 37     |
| Gf6OMT5  |        |        |         |        |         |         |          |         |        |         |         |          |          |        |         |         |         |          |         |         |         |         |         |         | 100             | 82      | 77      | 40      | 43      | 43     | 43     | 45     |
| Ec62OMT  |        |        |         |        |         |         |          |         |        |         |         |          |          |        |         |         |         |          |         |         |         |         |         |         |                 | 100     | 75      | 40      | 42      | 44     | 43     | 45     |
| Gf6OMT7  |        |        |         |        |         |         |          |         |        |         |         |          |          |        |         |         |         |          |         |         |         |         |         |         |                 |         | 100     | 42      | 44      | 46     | 45     | 47     |
| Ps6OMT1  |        |        |         |        |         |         |          |         |        |         |         |          |          |        |         |         |         |          |         |         |         |         |         |         |                 |         |         | 100     | 63      | 61     | 60     | 64     |
| Gf6OMT6  |        |        |         |        |         |         |          |         |        |         |         |          |          |        |         |         |         |          |         |         |         |         |         |         |                 |         |         |         | 100     | 67     | 68     | 68     |
| Tf6OMT   |        |        |         |        |         |         |          |         |        |         |         |          |          |        |         |         |         |          |         |         |         |         |         |         |                 |         |         |         |         | 100    | 89     | 88     |
| Cj6OMT   |        |        |         |        |         |         |          |         |        |         |         |          |          |        |         |         |         |          |         |         |         |         |         |         |                 |         |         |         |         |        | 100    | 98     |
| Ct6OMT   |        |        |         |        |         |         |          |         |        |         |         |          |          |        |         |         |         |          |         |         |         |         |         |         |                 |         |         |         |         |        |        | 100    |

**Supplementary Figure 1. Percent identity matrix for amino acid sequences of BIA *O*-methyltransferases characterized at the molecular level.** Protein sequences were obtained by translation of nucleotide sequences deposited in Genbank (accession numbers provided in Supplementary Table 1) and aligned using Clustal Omega under default parameters (Chojnacki et al., 2017). Percentage identities are shaded with from green (maximum, 100%) to minimum (red, 25%).

Chojnacki, S., Cowley, A., Lee, J., Foix, A., and Lopez, R. (2017). Programmatic access to bioinformatics tools from EMBL-EBI update: 2017. *Nucleic Acids Res.* 45, W550–W553. doi:10.1093/nar/gkx273.
